# Supplementary material for: Deficiency of IQCH causes male infertility in humans and mice
Source: eLife journal article supplement (doi:10.7554/elife.88905), 2023-08-29
Supplement: fig6-data3 [file elife-88905-fig6-data3-v1.zip]

100

100

100
