# Supplementary figures and images for: Deficiency of IQCH causes male infertility in humans and mice
Source: eLife journal article supplement (doi:10.7554/elife.88905), 2023-08-29

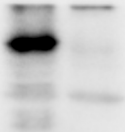

Supplement: fig1-data2 [file elife-88905-fig1-data2-v1.zip]

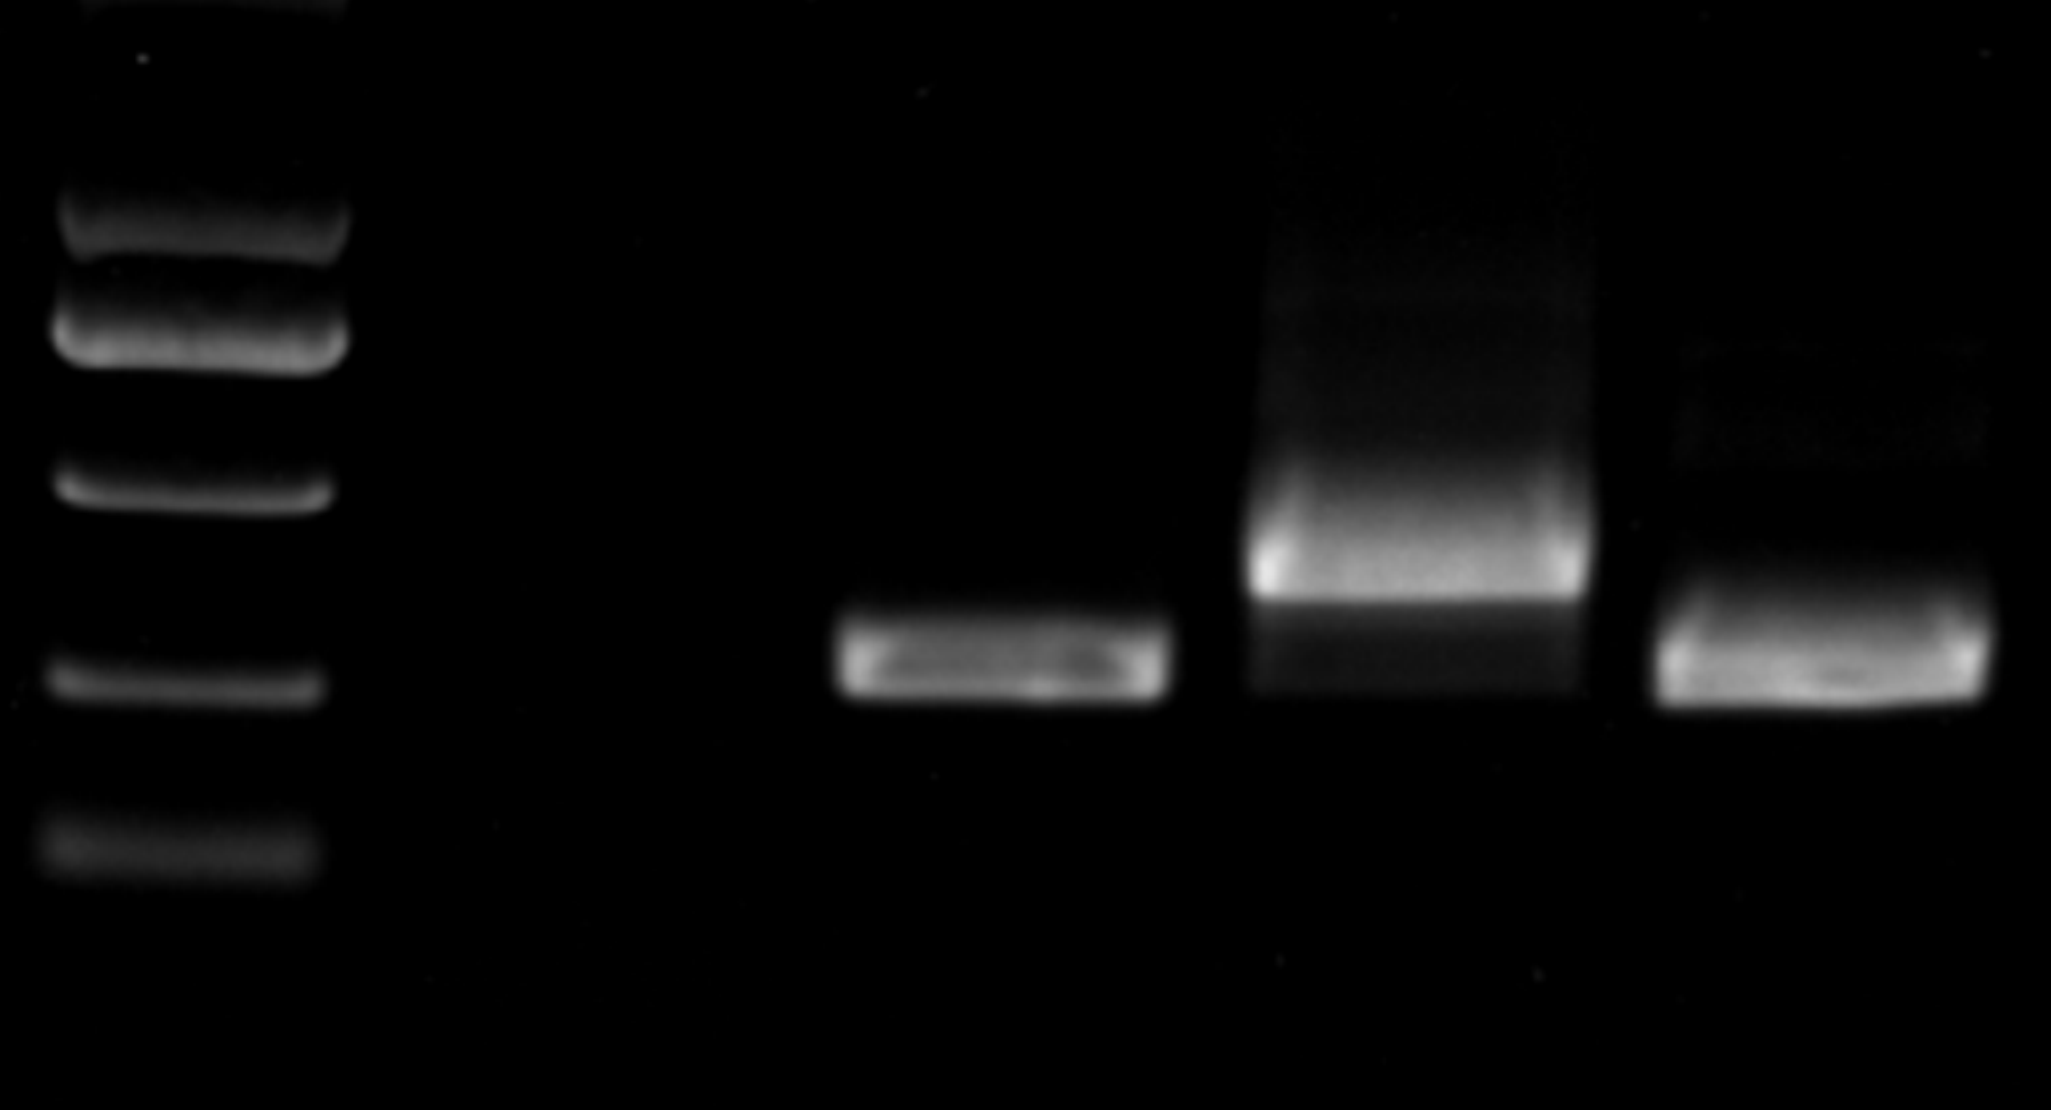

Supplement: fig1-data2 [file elife-88905-fig1-data2-v1.zip]

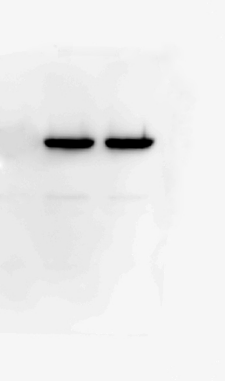

Supplement: fig1-data2 [file elife-88905-fig1-data2-v1.zip]

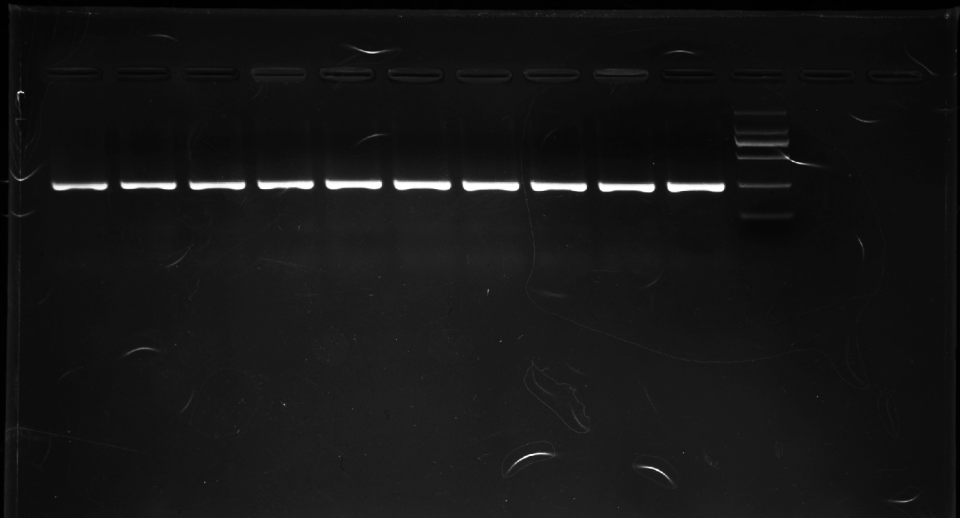

Supplement: fig3-figsupp1-data1 [file elife-88905-fig3-figsupp1-data1-v1.zip]

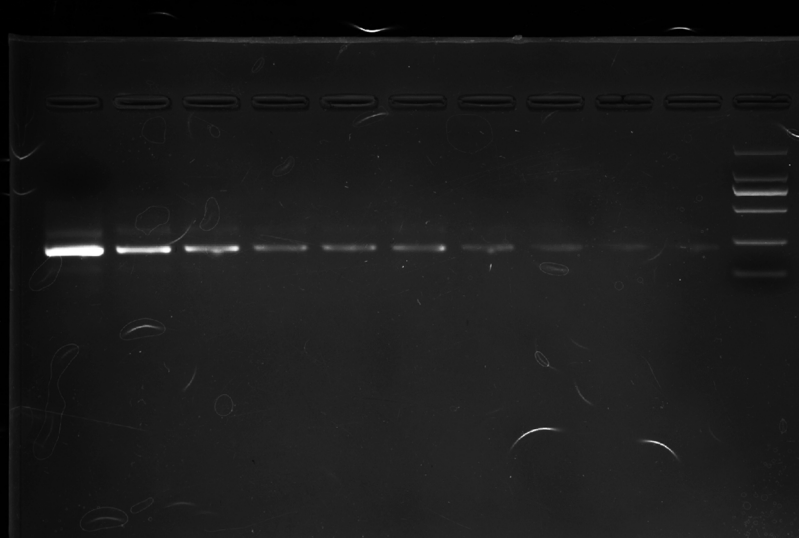

Supplement: fig3-figsupp1-data1 [file elife-88905-fig3-figsupp1-data1-v1.zip]

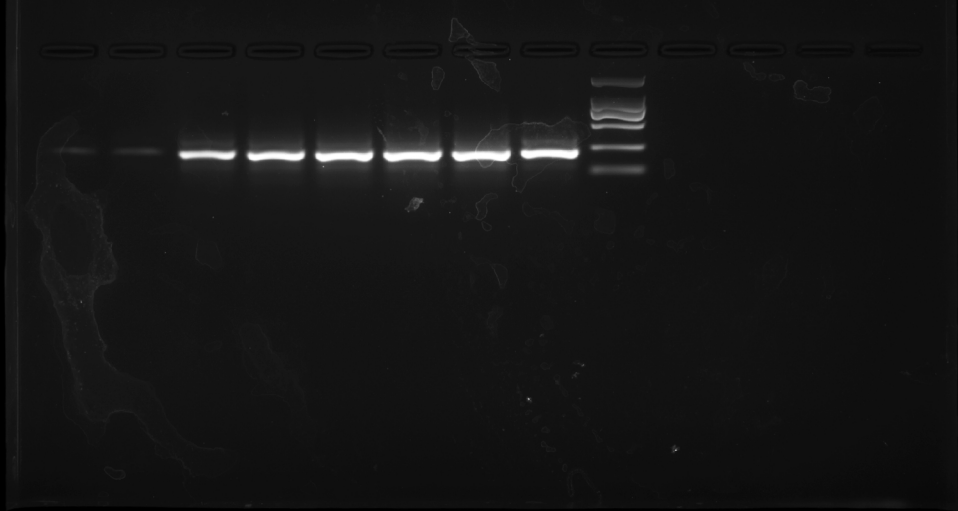

Supplement: fig3-figsupp1-data1 [file elife-88905-fig3-figsupp1-data1-v1.zip]

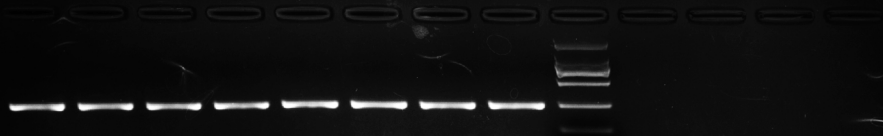

Supplement: fig3-figsupp1-data1 [file elife-88905-fig3-figsupp1-data1-v1.zip]

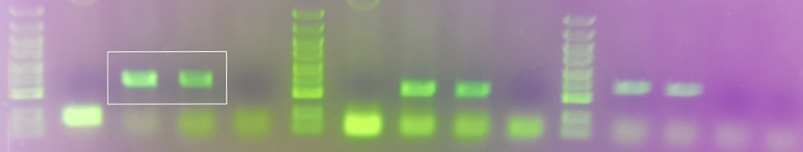

Gapdh

Supplement: fig3-figsupp2-data1 [file elife-88905-fig3-figsupp2-data1-v1.zip]

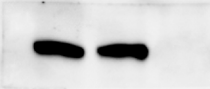

Supplement: fig3-figsupp2-data1 [file elife-88905-fig3-figsupp2-data1-v1.zip]

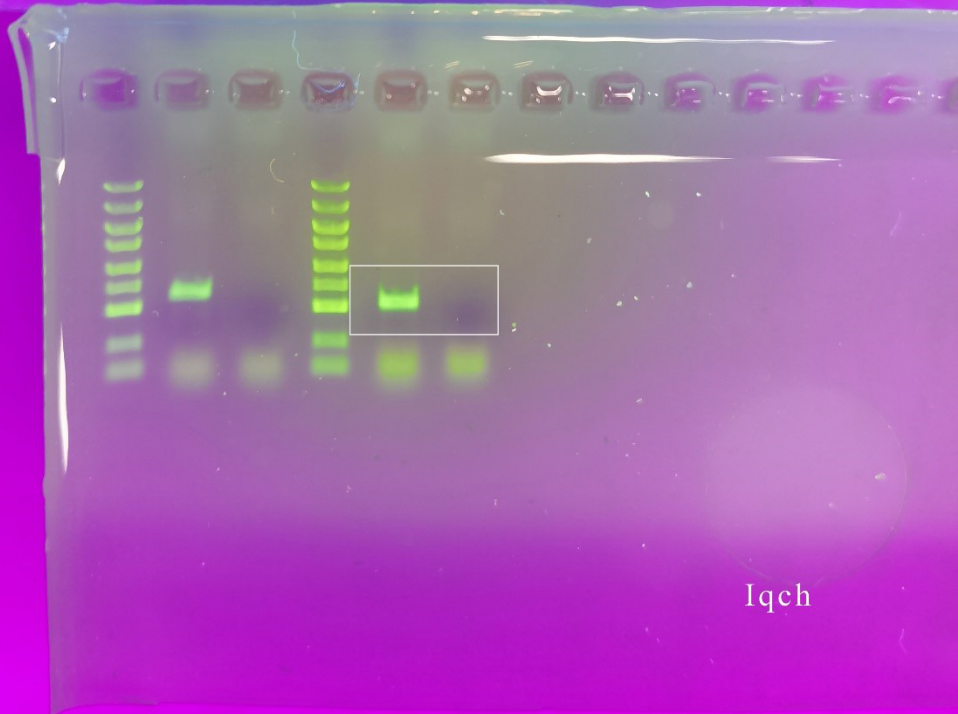

Iqch

Supplement: fig3-figsupp2-data1 [file elife-88905-fig3-figsupp2-data1-v1.zip]

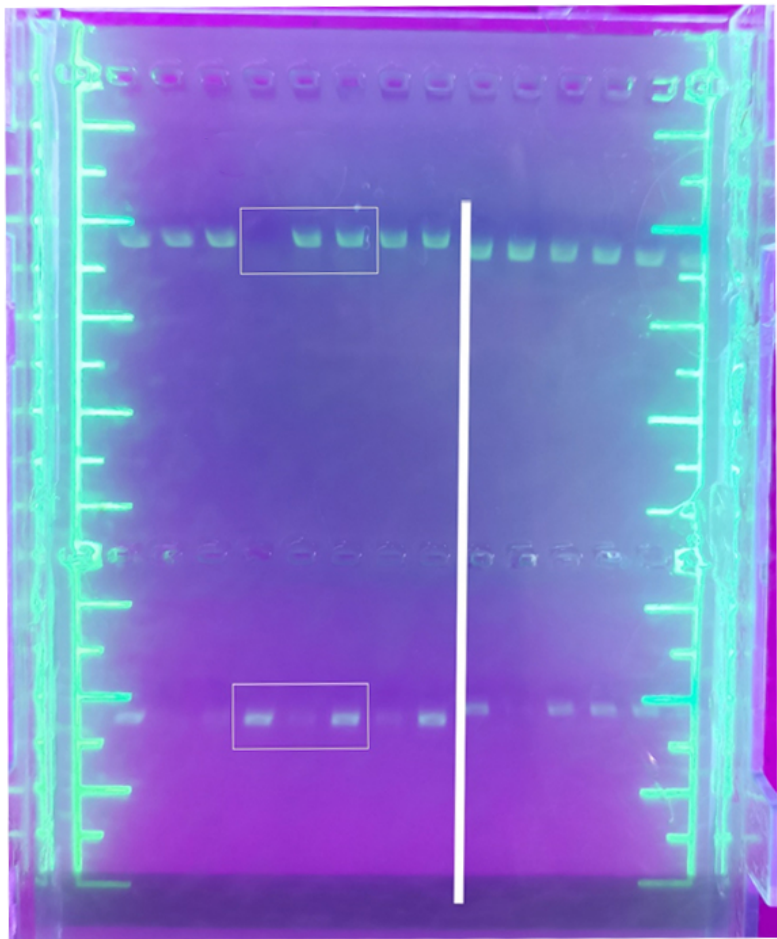

Supplement: fig3-figsupp2-data1 [file elife-88905-fig3-figsupp2-data1-v1.zip]

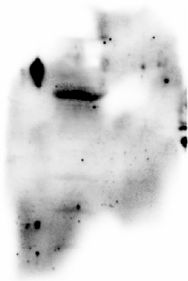

Supplement: fig3-figsupp2-data1 [file elife-88905-fig3-figsupp2-data1-v1.zip]

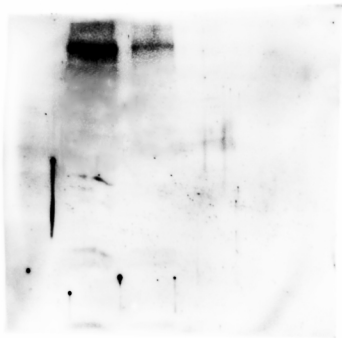

Supplement: fig6-data3 [file elife-88905-fig6-data3-v1.zip]

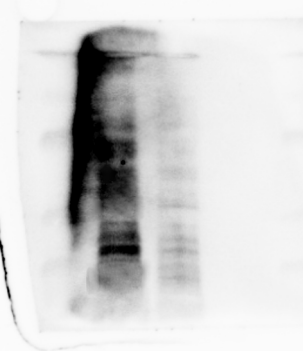

Supplement: fig6-data3 [file elife-88905-fig6-data3-v1.zip]

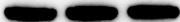

Supplement: fig6-data3 [file elife-88905-fig6-data3-v1.zip]

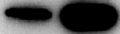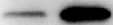

Supplement: fig6-data3 [file elife-88905-fig6-data3-v1.zip]

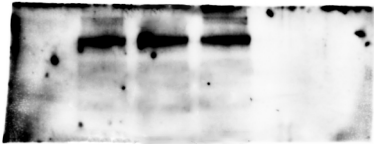

Supplement: fig6-data3 [file elife-88905-fig6-data3-v1.zip]

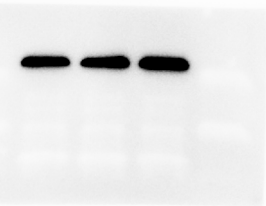

Supplement: fig6-data3 [file elife-88905-fig6-data3-v1.zip]

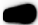

1871

1872

1873

1874

1875

1876

1877

1878

1879

1880

1881

1882

1883

1884

1885

1886

1887

1888

1889

1890

Supplement: fig6-data3 [file elife-88905-fig6-data3-v1.zip]

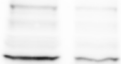

Supplement: fig6-data3 [file elife-88905-fig6-data3-v1.zip]

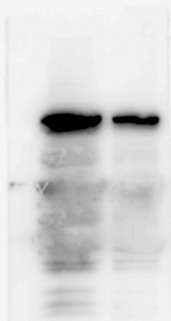

Supplement: fig6-data3 [file elife-88905-fig6-data3-v1.zip]

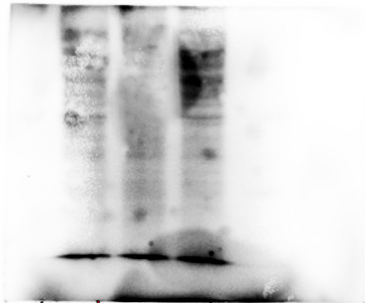

Supplement: fig6-data3 [file elife-88905-fig6-data3-v1.zip]

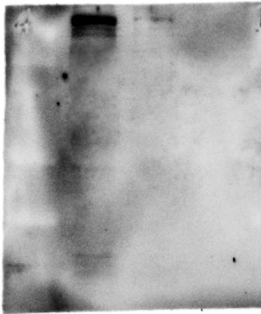

Supplement: fig6-data3 [file elife-88905-fig6-data3-v1.zip]

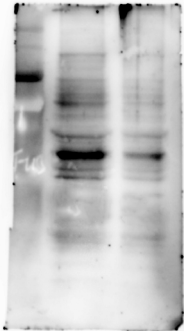

Supplement: fig6-data3 [file elife-88905-fig6-data3-v1.zip]

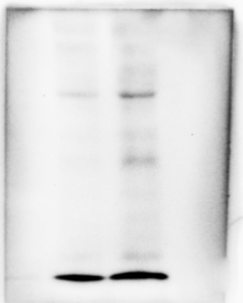

Supplement: fig6-data3 [file elife-88905-fig6-data3-v1.zip]

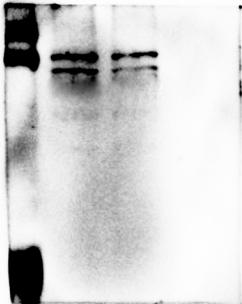

Supplement: fig6-data3 [file elife-88905-fig6-data3-v1.zip]

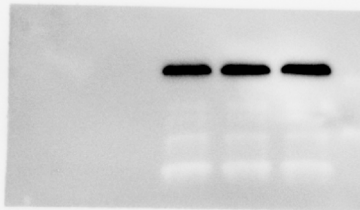

Supplement: fig6-data3 [file elife-88905-fig6-data3-v1.zip]

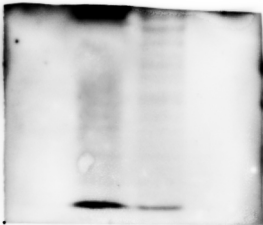

Supplement: fig6-data3 [file elife-88905-fig6-data3-v1.zip]

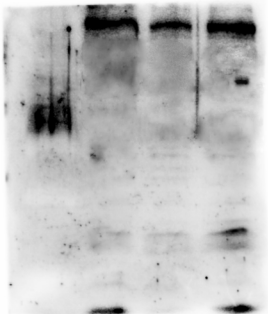

Supplement: fig6-data3 [file elife-88905-fig6-data3-v1.zip]

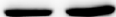

Supplement: fig6-data3 [file elife-88905-fig6-data3-v1.zip]

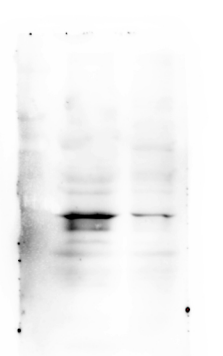

Supplement: fig6-data3 [file elife-88905-fig6-data3-v1.zip]

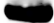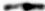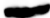

Supplement: fig6-data3 [file elife-88905-fig6-data3-v1.zip]

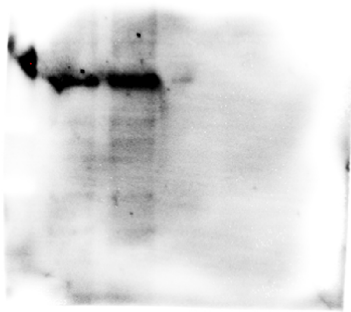

Supplement: fig6-data3 [file elife-88905-fig6-data3-v1.zip]

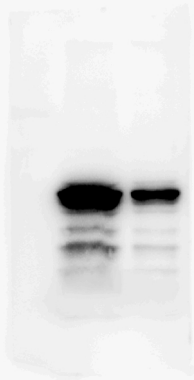

Supplement: fig6-data3 [file elife-88905-fig6-data3-v1.zip]

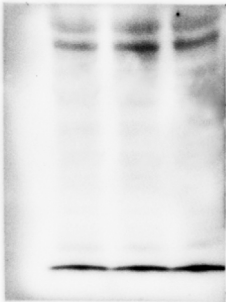

Supplement: fig6-data3 [file elife-88905-fig6-data3-v1.zip]

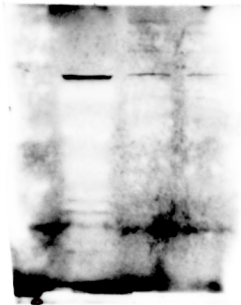

Supplement: fig6-data3 [file elife-88905-fig6-data3-v1.zip]

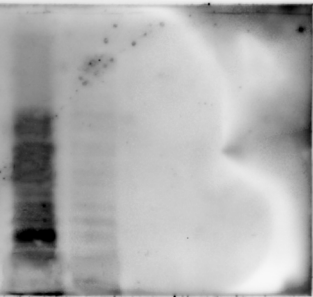

Supplement: fig6-data3 [file elife-88905-fig6-data3-v1.zip]

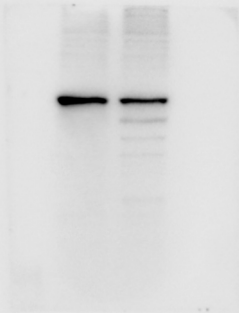

Supplement: fig6-data3 [file elife-88905-fig6-data3-v1.zip]

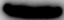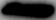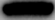

Supplement: fig6-data3 [file elife-88905-fig6-data3-v1.zip]

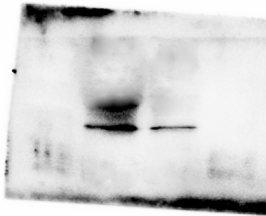

Supplement: fig6-data3 [file elife-88905-fig6-data3-v1.zip]

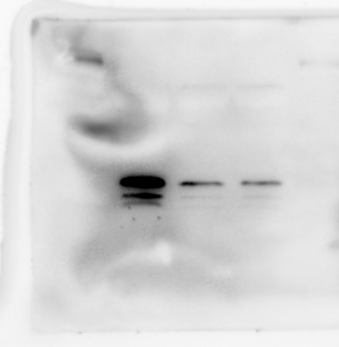

Supplement: fig6-data3 [file elife-88905-fig6-data3-v1.zip]

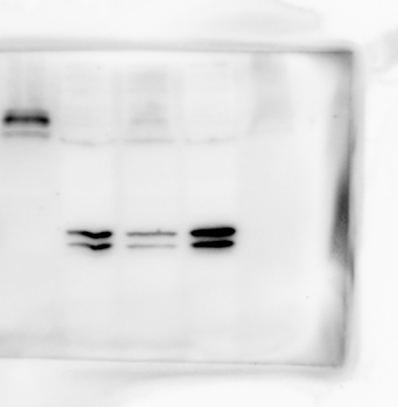

Supplement: fig6-data3 [file elife-88905-fig6-data3-v1.zip]

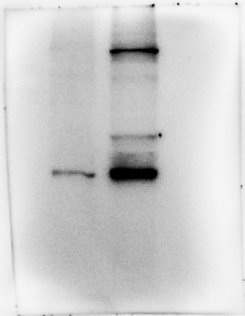

Supplement: fig6-data3 [file elife-88905-fig6-data3-v1.zip]

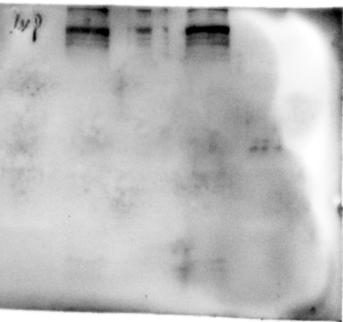

Supplement: fig6-data3 [file elife-88905-fig6-data3-v1.zip]

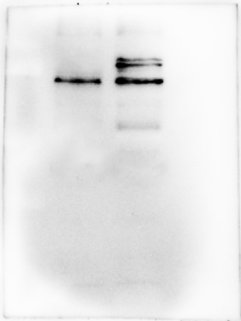

Supplement: fig6-data3 [file elife-88905-fig6-data3-v1.zip]

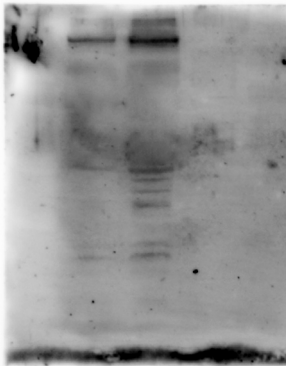

Supplement: fig6-data3 [file elife-88905-fig6-data3-v1.zip]

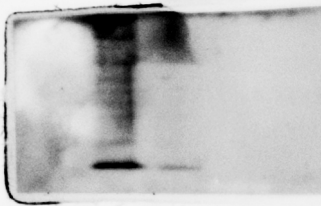

Supplement: fig6-data3 [file elife-88905-fig6-data3-v1.zip]

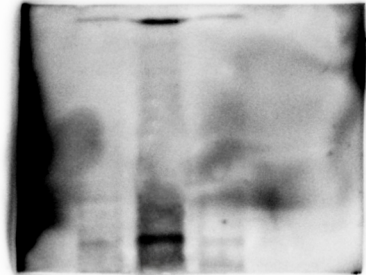

Supplement: fig6-data3 [file elife-88905-fig6-data3-v1.zip]

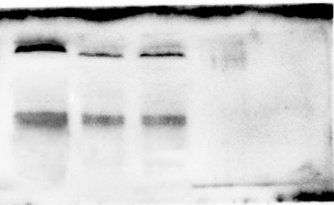

Supplement: fig6-data3 [file elife-88905-fig6-data3-v1.zip]

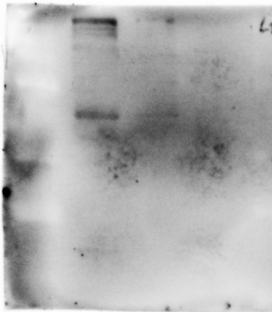

Supplement: fig6-data3 [file elife-88905-fig6-data3-v1.zip]

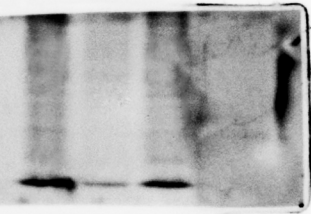

Supplement: fig6-data3 [file elife-88905-fig6-data3-v1.zip]

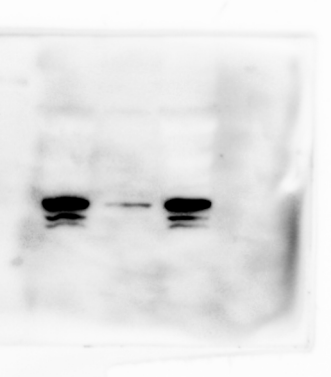

Supplement: fig6-data3 [file elife-88905-fig6-data3-v1.zip]

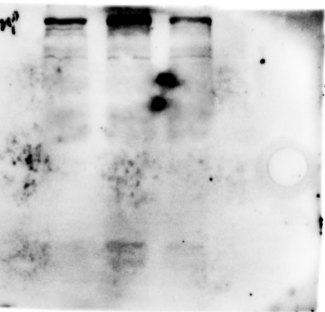

Supplement: fig6-data3 [file elife-88905-fig6-data3-v1.zip]

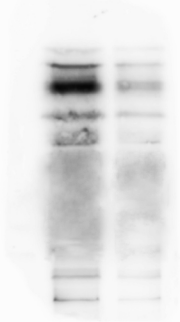

Supplement: fig6-data3 [file elife-88905-fig6-data3-v1.zip]
